# Supplementary material
Source: MDPI journal article supplement (https://www.mdpi.com/2071-1050/14/9/5045)
Supplement: s1 [file s1]

**Table S1.** Initial factor loading matrix and eigenvectors

| Indicator | Principal component |        |        | Eigenvectors |        |        |
|-----------|---------------------|--------|--------|--------------|--------|--------|
|           | 1                   | 2      | 3      | A1           | A2     | A3     |
| X1        | 0.902               | -0.184 | 0.294  | 0.478        | 0.085  | 0.144  |
| X2        | 0.888               | 0.117  | 0.161  | 0.315        | 0.471  | -0.258 |
| X3        | -0.838              | 0.358  | 0.159  | 0.212        | -0.402 | -0.441 |
| X4        | 0.749               | 0.418  | -0.19  | 0.008        | 0.577  | 0.344  |
| X5        | 0.014               | 0.794  | 0.385  | -0.451       | 0.260  | 0.142  |
| X6        | 0.585               | 0.648  | -0.289 | 0.403        | 0.304  | -0.170 |
| X7        | 0.393               | -0.553 | -0.493 | 0.486        | -0.134 | 0.263  |
| X8        | 0.29                | -0.429 | 0.776  | 0.156        | -0.312 | 0.694  |

**Table S2.** The main properties of biochar and compost.

|                      | pH   | Ash/<br>% | TC/<br>% | TN/<br>% | AP/<br>(g·kg <sup>-1</sup> ) | AK/<br>(g·kg <sup>-1</sup> ) |
|----------------------|------|-----------|----------|----------|------------------------------|------------------------------|
|                      |      |           |          |          |                              |                              |
| Rice husk<br>biochar | 9.41 | 13.5      | 46.3     | 0.6      | 21.31                        | 2.54                         |
| Wood biochar         | 8.89 | 63.5      | 58.9     | 1.3      | 53.52                        | 2.69                         |
| Compost              | pH   | SOM/%     | TN/%     | TP/%     | TK/%                         | NPK/%                        |
|                      | 8.5  | 82.3      | 1.71     | 4.28     | 0.86                         | 6.85                         |

**Table S3.** Effects of biochar-based fertilizers and species on soil nutrient contents

| Treatments                   |         | CK            | MF            | RH2MF        | RH4MF         | W2MF           | W4MF         | Average (Species) |
|------------------------------|---------|---------------|---------------|--------------|---------------|----------------|--------------|-------------------|
| TN<br>(g·kg <sup>-1</sup> )  | W       | 1.46±0.36     | 1.51±0.14     | 1.72±0.47    | 1.53±0.01     | 1.49±0.14      | 1.43±0.06    | 1.52±0.10B        |
|                              | S       | 1.62±0.07     | 1.59±0.09     | 1.6±0.07     | 1.54±0.02     | 1.55±0.06      | 1.45±0.17    | 1.56±0.06B        |
|                              | L       | 1.33±0.16     | 1.28±0.15     | 1.45±0.2     | 1.39±0.12     | 1.35±0.25      | 1.45±0.25    | 1.37±0.07A        |
|                              | Average | 1.47±0.14a    | 1.46±0.17a    | 1.59±0.13a   | 1.49±0.09a    | 1.46±0.11a     | 1.44±0.01a   |                   |
| AN<br>(mg·kg <sup>-1</sup> ) | W       | 106.41±0.61   | 121.84±3.89   | 112.44±2.66  | 114.35±3.53   | 120.24±6.37    | 111.73±2.02  | 114.50±3.73A      |
|                              | S       | 100.14±8.54   | 123.03±8.69   | 111.01±4.59  | 116.39±4      | 117.41±1.99    | 111.81±2.27  | 113.63±8.29A      |
|                              | L       | 106.92±3.96   | 117.82±4.97   | 108.46±6.48  | 120.27±6.89   | 118.31±7.6     | 113.07±2.56  | 114.14±3.55A      |
|                              | Average | 104.49±3.78a  | 121.56±3.61d  | 110.64±2.01b | 117±3.01cd    | 118.65±1.44d   | 112.2±0.75bc |                   |
| TP<br>(mg·kg <sup>-1</sup> ) | W       | 240.89±8.67   | 298.42±12.9   | 326.56±28.23 | 310.59±7.41   | 268.25±43.33   | 227.28±16.83 | 278.67±39.70B     |
|                              | S       | 222.57±36.73  | 269.61±21.67  | 343.98±46.61 | 310.54±56.84  | 224.78±28.58   | 252.87±10.79 | 271.06±48.98B     |
|                              | L       | 200.95±221.47 | 228.84±263.63 | 276.37±316.3 | 323.14±313.42 | 253.15±248.73  | 214.33±231.5 | 249.80±43.78A     |
|                              | Average | 221.47±20a    | 263.63±34.96b | 316.3±33.92c | 313.42±8.42c  | 248.73±22.07ab | 231.5±19.61a |                   |
| AP<br>(mg·kg <sup>-1</sup> ) | W       | 11.46±0.27    | 53.4±2        | 68.75±3.12   | 62.92±12.4    | 53.53±1.16     | 54.59±4.91   | 50.78±20.22A      |
|                              | S       | 10.48±0.38    | 49.09±1.91    | 74.84±1.83   | 71.44±6.55    | 49.77±3.64     | 59.53±19.54  | 52.53±23.20A      |
|                              | L       | 10.99±0.12    | 52.49±11.33   | 63.54±33.96  | 73.51±3.81    | 59.36±12.62    | 61.31±4.87   | 53.53±21.93A      |
|                              | Average | 10.98±0.49a   | 51.66±2.27b   | 69.04±3.66c  | 69.29±3.61c   | 54.22±4.83b    | 58.48±3.49bc |                   |

|                              |         |               |              |               |               |               |                |                |
|------------------------------|---------|---------------|--------------|---------------|---------------|---------------|----------------|----------------|
| TK<br>(g·kg <sup>-1</sup> )  | W       | 21.03±1.84    | 21.09±0.61   | 22.74±0.33    | 23.41±0.35    | 19±2.62       | 13.67±0.68     | 20.49±2.82B    |
|                              | S       | 20.54±0.58    | 20.43±0.91   | 22.34±1.18    | 22.88±0.82    | 16.44±2.54    | 17.14±1.61     | 19.96±2.65B    |
|                              | L       | 19.36±3.47    | 16.31±1.76   | 20.5±2.38     | 20.58±2.98    | 17.23±2.22    | 14.45±1.59     | 18.07±2.48A    |
|                              | Average | 20.31±0.86cd  | 19.28±2.59bc | 21.86±1.19de  | 22.29±1.51e   | 17.56±1.31b   | 13.76±1.35a    |                |
| AK<br>(mg·kg <sup>-1</sup> ) | W       | 132.1±13.5    | 388.12±32.75 | 718.26±212.75 | 770.21±32.16  | 548.73±12.52  | 609.92±22.73   | 527.89±233.93A |
|                              | S       | 148.06±8.28   | 391.82±40.64 | 652.01±17.44  | 809.11±27.22  | 541.58±12.16  | 628.36±68.65   | 528.49±231.33A |
|                              | L       | 157.91±17.76  | 383.87±18.58 | 796.09±298.74 | 892.96±72.01  | 578.83±23.98  | 671.5±60.97    | 580.53±271.61A |
|                              | Average | 146.02±13.03a | 388.61±3b    | 722.12±72.12d | 824.09±62.73e | 556.38±19.77c | 636.59±31.61cd |                |
